# Supplementary material for: Developing novel zinc(ii) and copper(ii) Schiff base complexes: combined experimental and theoretical investigation on their DNA/protein binding efficacy and anticancer activity
Source: Royal Society of Chemistry journal article supplement (doi:10.1039/d0nj03844j), 2020-01-01
Supplement: d0nj03844j1.pdf [file d0nj03844j1.pdf]

## Supporting Information

### **Developing Novel Zinc(II) and Copper(II) Schiff Base Complexes: Combined Experimental and Theoretical Investigation on Their DNA/Protein Binding Study and Anticancer Activity**

Manik Das,<sup>a</sup> Somali Mukherjee,<sup>\*b</sup> Biplab Koley,<sup>c</sup> Indranil Choudhuri,<sup>d</sup> Nandan Bhattacharyya,<sup>d</sup> Pritam Roy,<sup>c</sup> Manas Barai,<sup>e</sup> Tithi Maity<sup>\*a</sup>

<sup>a</sup> Department of Chemistry, P. K. College, Contai, Purba Medinipur, West Bengal 721404, India.

<sup>b</sup> Department of Chemistry, University of Calcutta, 92, A. P. C. Road, Kolkata 700009, India.

<sup>c</sup> Department of Chemistry, Indian Institute of Technology Kharagpur, India.

<sup>d</sup> Department of Chemistry, Panskura Banamali College, Purba Medinipur, India.

<sup>e</sup> Department of Chemistry and Chemical Technology, Vidyasagar University, Paschim Medinipur, India.

| <b>Sl. No.</b> | <b>Index</b>                                                                         | <b>Page No.</b> |
|----------------|--------------------------------------------------------------------------------------|-----------------|
| <b>1.</b>      | FT-IR spectra of ligand and complex <b>1</b> and <b>2</b> ( <b>Fig. S1-S3</b> )      | <b>S3-S4</b>    |
| <b>2.</b>      | UV-Vis spectra of ligand and complexes ( <b>Fig. S4</b> )                            | <b>S4</b>       |
| <b>3.</b>      | ESI-MS analyses of complex <b>1</b> and <b>2</b> ( <b>Fig. S5-S6</b> )               | <b>S5</b>       |
| <b>4.</b>      | Bond lengths and bond angles of Complex <b>1</b> ( <b>Table S1</b> )                 | <b>S6</b>       |
| <b>5.</b>      | Bond lengths and bond angles of Complex <b>2</b> ( <b>Table S2</b> )                 | <b>S6</b>       |
| <b>6.</b>      | Time dependent UV-Vis spectra of complexes in CP buffer medium ( <b>Fig. S7-S8</b> ) | <b>S7</b>       |

|            |                                                                                                              |            |
|------------|--------------------------------------------------------------------------------------------------------------|------------|
| <b>7.</b>  | pH dependent UV-Vis spectra of complexes ( <b>Fig. S9-S10</b> )                                              | <b>S8</b>  |
| <b>8.</b>  | CD spectral changes in CT DNA upon addition of complex <b>1</b> and <b>2</b> ( <b>Fig. S11-S12</b> )         | <b>S9</b>  |
| <b>9.</b>  | Viscosity measurement analysis ( <b>Fig. S13</b> )                                                           | <b>S10</b> |
| <b>10.</b> | DNA - metal complexes patch dock score ( <b>Table S3</b> )                                                   | <b>S10</b> |
| <b>11.</b> | HSA - metal complexes patch dock score ( <b>Table S4</b> )                                                   | <b>S10</b> |
| <b>12.</b> | MTT assay on HeLa cell line using cis-platin as Positive control ( <b>Fig. S14</b> )                         | <b>S11</b> |
| <b>13.</b> | Cell viability of HeLa and PA1 cell line upon treatment with the Schiff base ligand (HL) ( <b>Fig. S15</b> ) | <b>S11</b> |
| <b>14.</b> | Effect of complex <b>1</b> and <b>2</b> on normal cell line (hEG) ( <b>Fig. S16</b> )                        | <b>S12</b> |

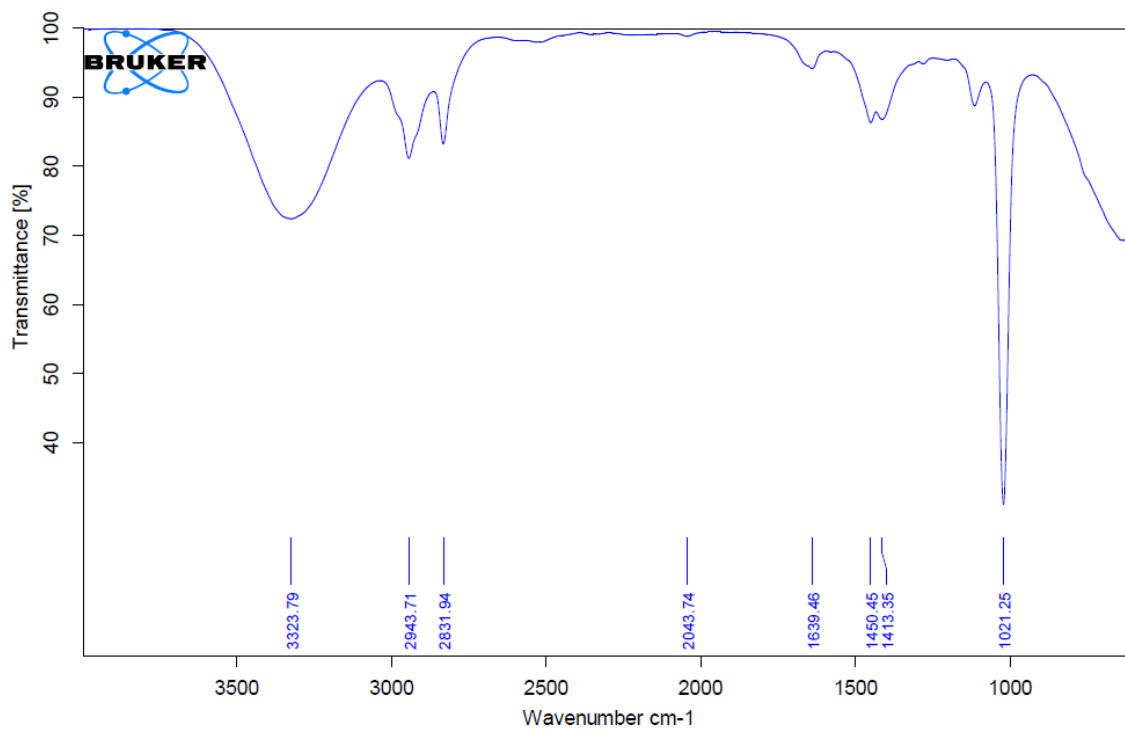

Fig. S1 FT-IR spectrum of ligand (HL).

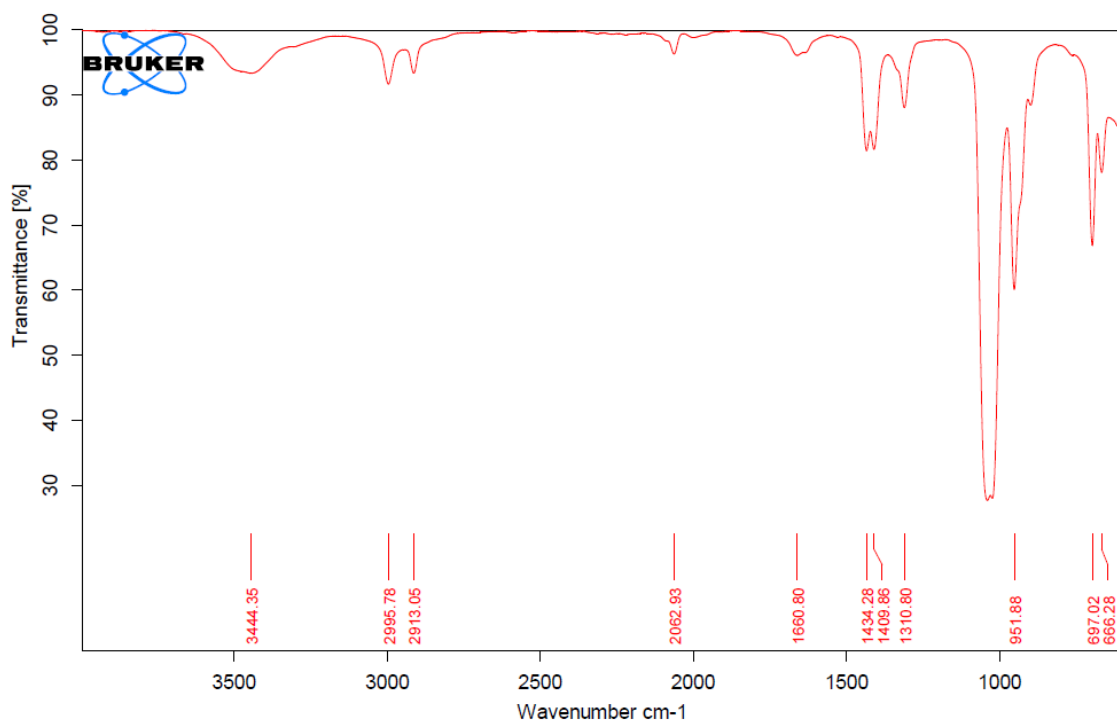

Fig. S2 FT-IR spectrum of Complex 1.

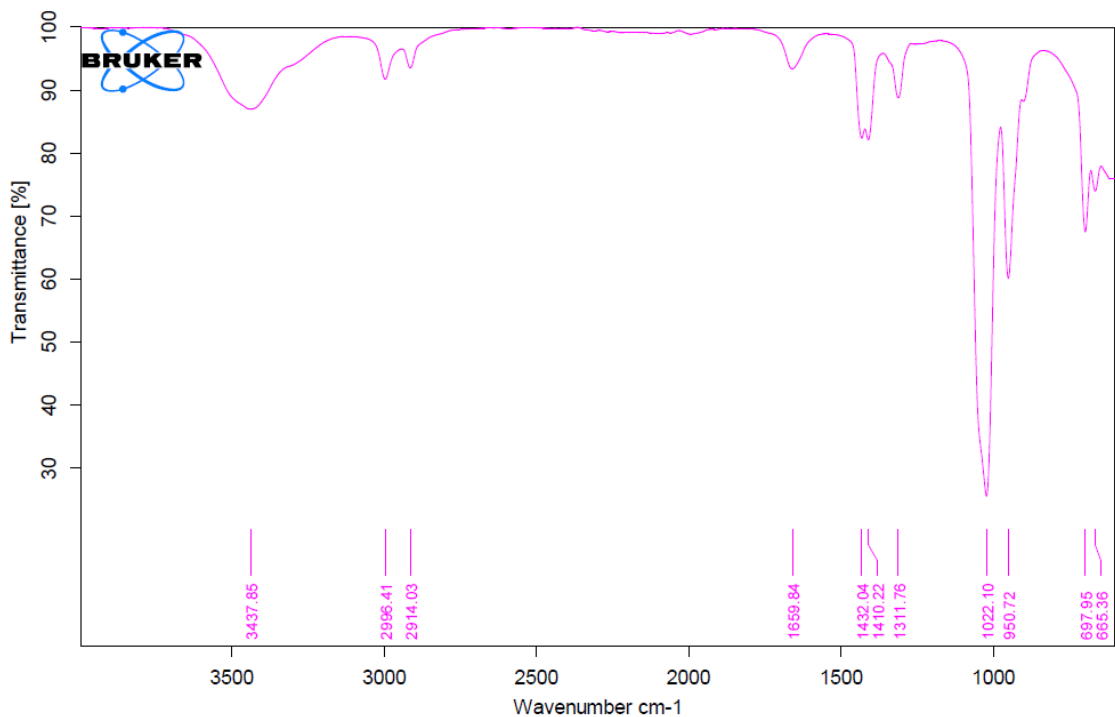

**Fig. S3** FT-IR spectrum of Complex 2.

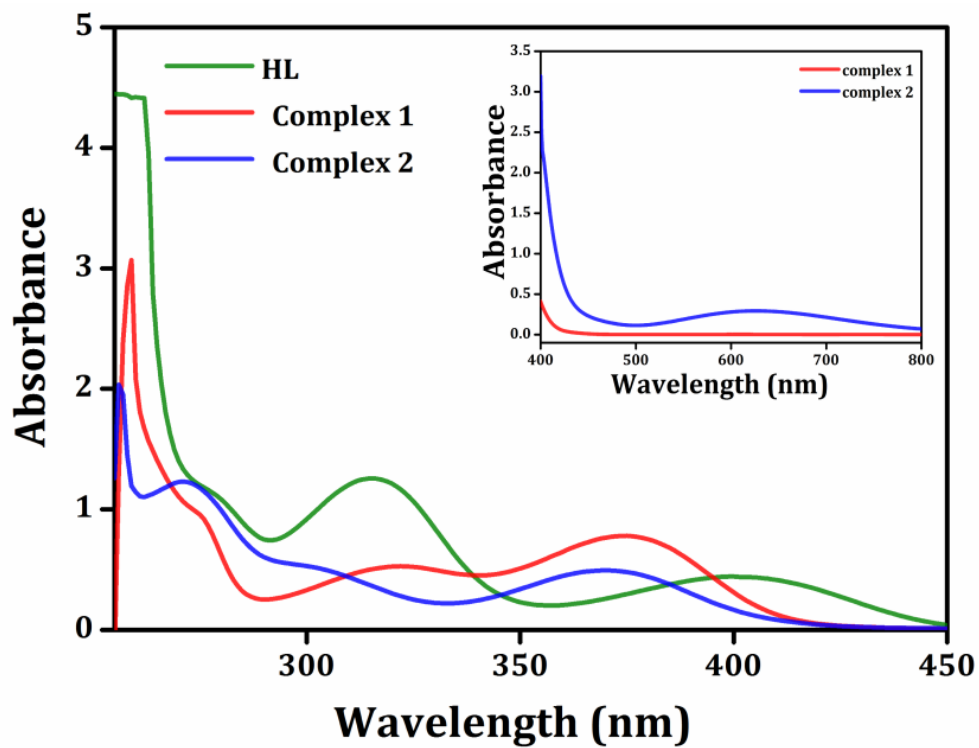

**Fig. S4** UV-Vis spectra of ligand and complexes.

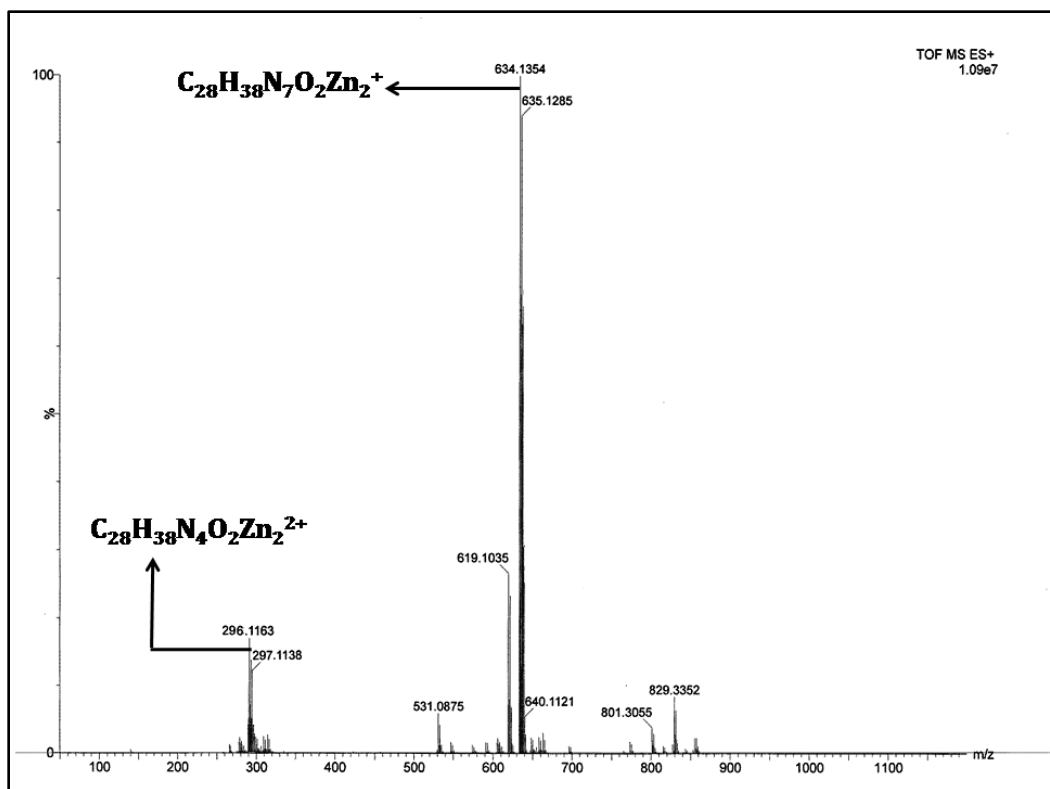

Fig. S5 ESI Mass Spectral analysis of complex 1.

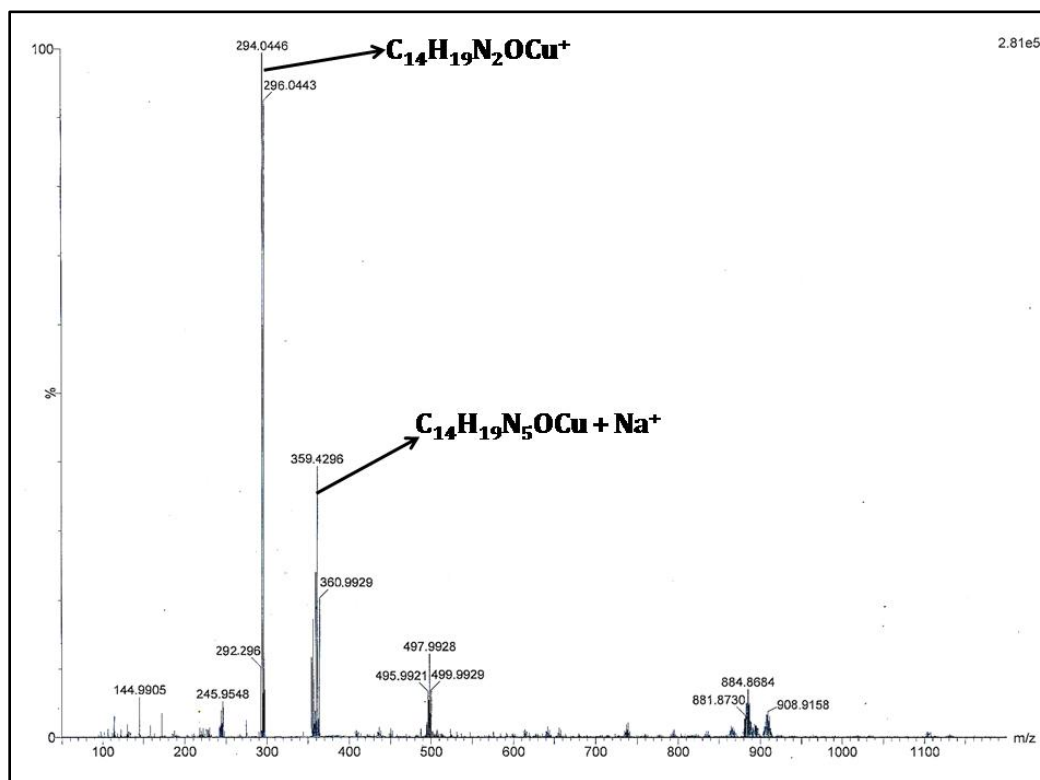

Fig. S6 ESI Mass Spectral analysis of complex 2.

**Table S1** Selected bond lengths and bond angles of Complex 1.

| Complex 1       |            |                |           |            |           |
|-----------------|------------|----------------|-----------|------------|-----------|
| Bond length (Å) |            | Bond angle (°) |           |            |           |
| Zn1-O1          | 1.9800(12) | O1-Zn1-N1      | 89.83(5)  | O1-Zn1-O1a | 77.54(4)  |
| Zn1-N1          | 2.1376(14) | O1-Zn1-N3      | 120.57(7) | N3-Zn1-N6  | 119.56(8) |
| Zn1-N3          | 2.0293(19) | O1-Zn1-N6      | 119.86(6) | O1a-Zn1-N1 | 167.28(5) |
| Zn1-N6          | 2.0291(16) | N1-Zn1-N3      | 91.05(7)  | O1a-Zn1-N3 | 96.66(8)  |
| Zn1-O1a         | 2.1736(11) | N1-Zn1-N6      | 90.54(6)  | O1a-Zn1-N6 | 94.42(5)  |

**Table S2** Selected bond lengths and bond angles of Complex 2.

| Complex 2       |          |                |            |            |           |
|-----------------|----------|----------------|------------|------------|-----------|
| Bond length (Å) |          | Bond angle (°) |            |            |           |
| Cu1-O1          | 1.897(4) | O1-Cu1-N2      | 93.77(18)  | N1-Cu1-N10 | 88.30(18) |
| Cu1-N1          | 2.075(5) | O1-Cu1-N1      | 178.63(18) | N2-Cu1-N10 | 78.59(17) |
| Cu1-N2          | 1.936(5) | O1-Cu1-N3      | 90.42(19)  | N3-Cu1-N10 | 111.8(2)  |
| Cu1-N3          | 1.970(6) | N1-Cu1-N2      | 84.87(19)  | O1-Cu1-N10 | 91.28(16) |
| Cu1-N10         | 2.839(5) | N1-Cu1-N3      | 90.9(2)    | N2-Cu1-N3  | 168.8(2)  |

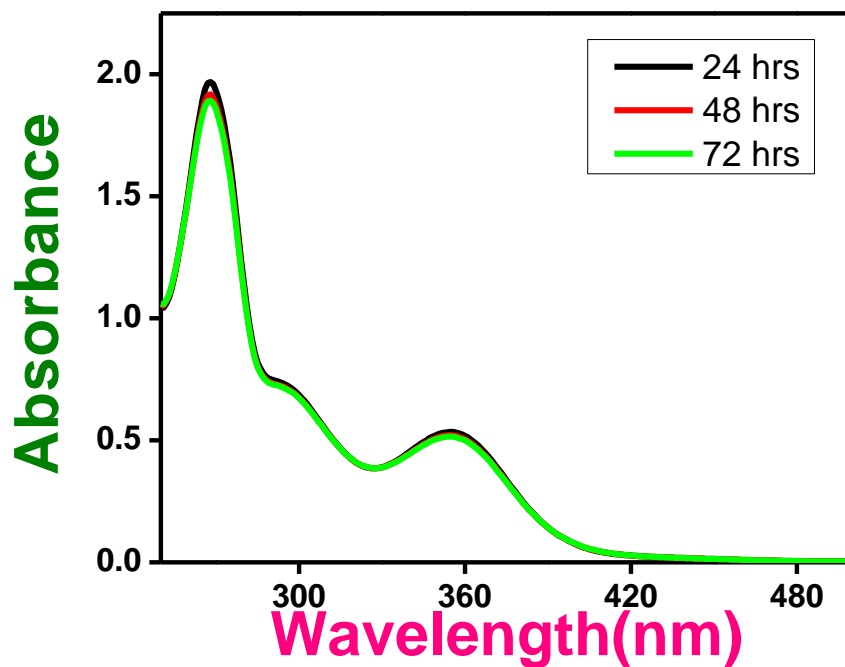

Fig. S7 Time dependent absorbance graph for complex 1 in CP buffer at pH 7.4.

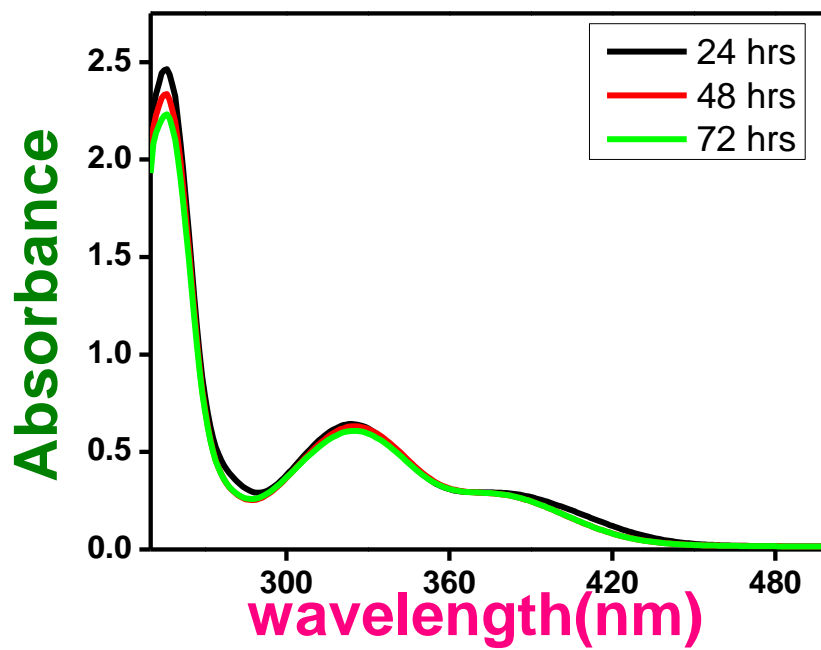

Fig. S8 Time dependent absorbance graph for complex 2 in CP buffer at pH 7.4.

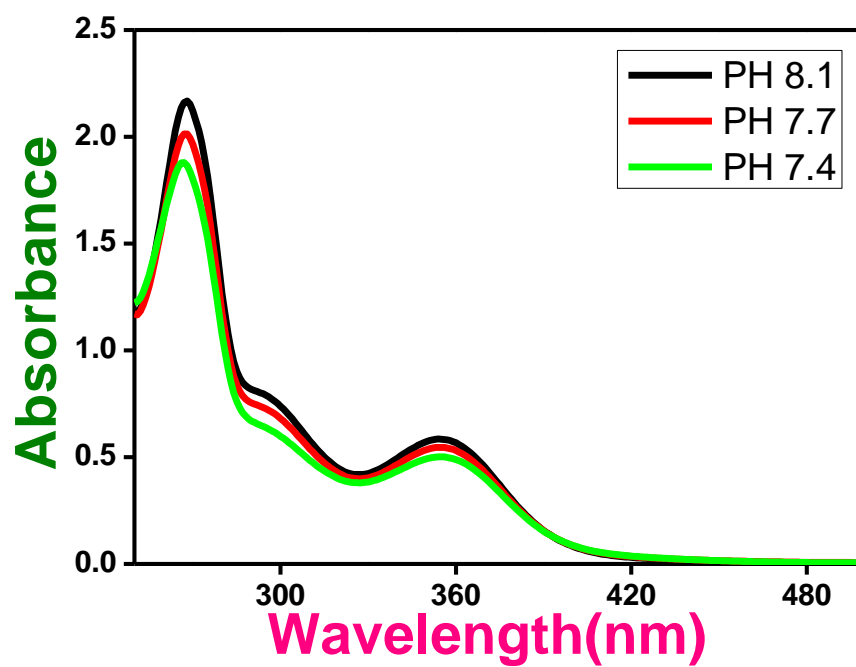

Fig. S9 pH dependent absorbance graph for complex 1.

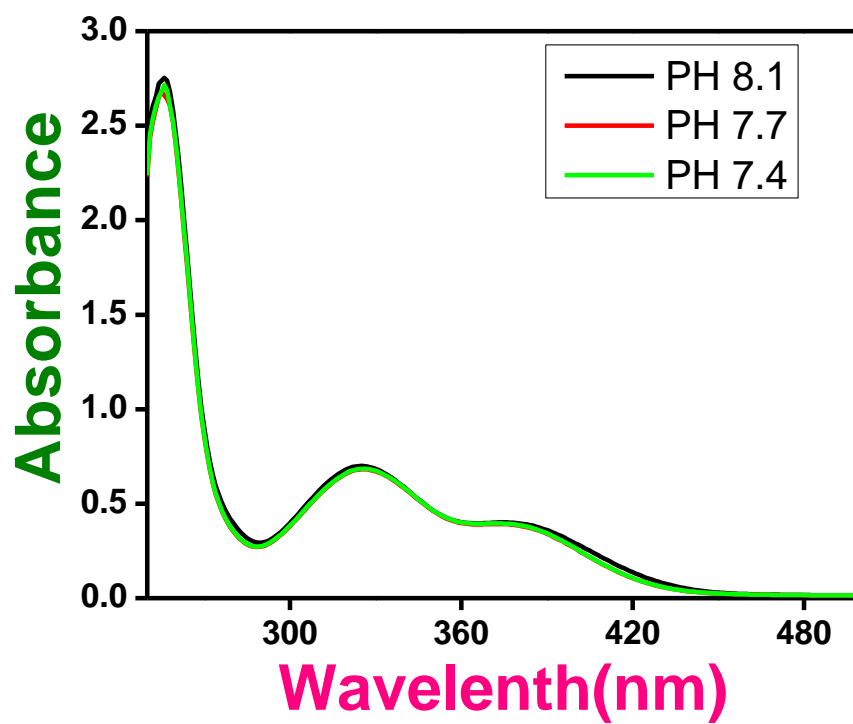

Fig. S10 pH dependent absorbance graph for complex 2.



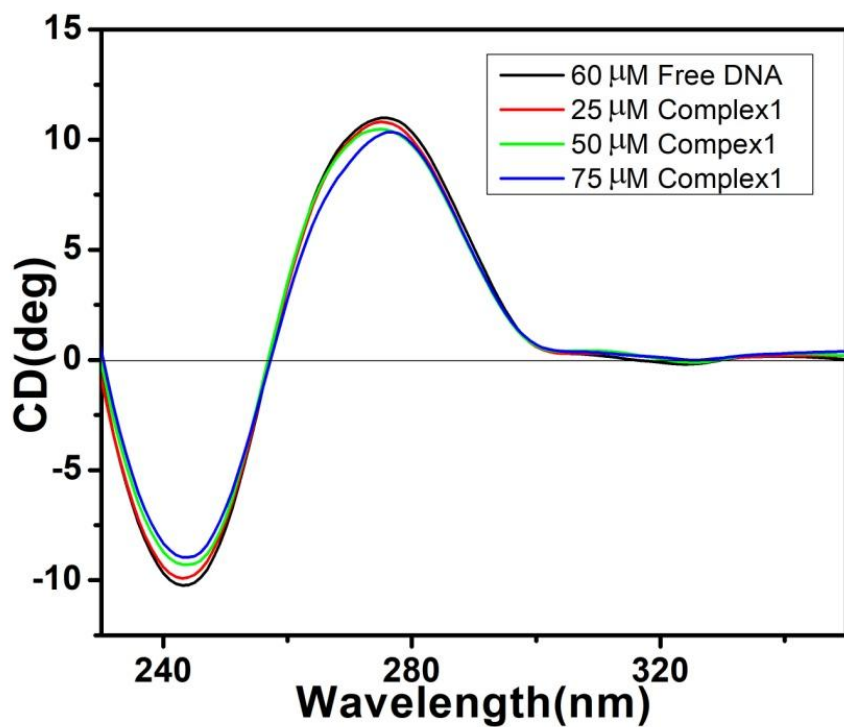

**Fig. S11** CD spectral changes in CT DNA (60 $\mu$ M) upon addition of complex 1 (D/P=10.0) in 10mM CP buffer (blue line indicates the CD of CT-DNA).

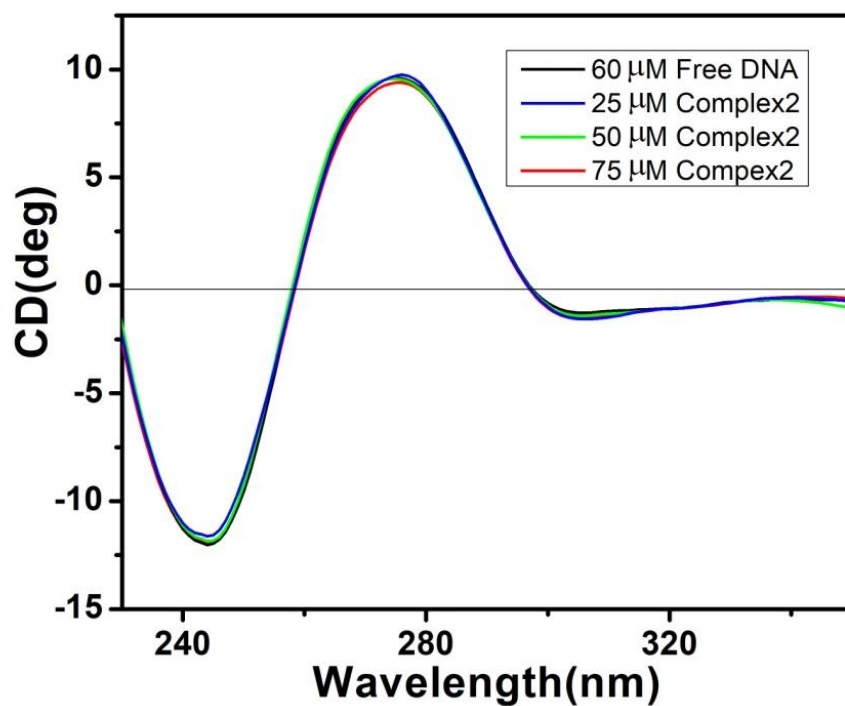

**Fig. S12** CD spectral changes in CT DNA (60 $\mu$ M) upon addition of complex 2 (D/P=10.0) in 10mM CP buffer (blue line indicates the CD of CT-DNA).

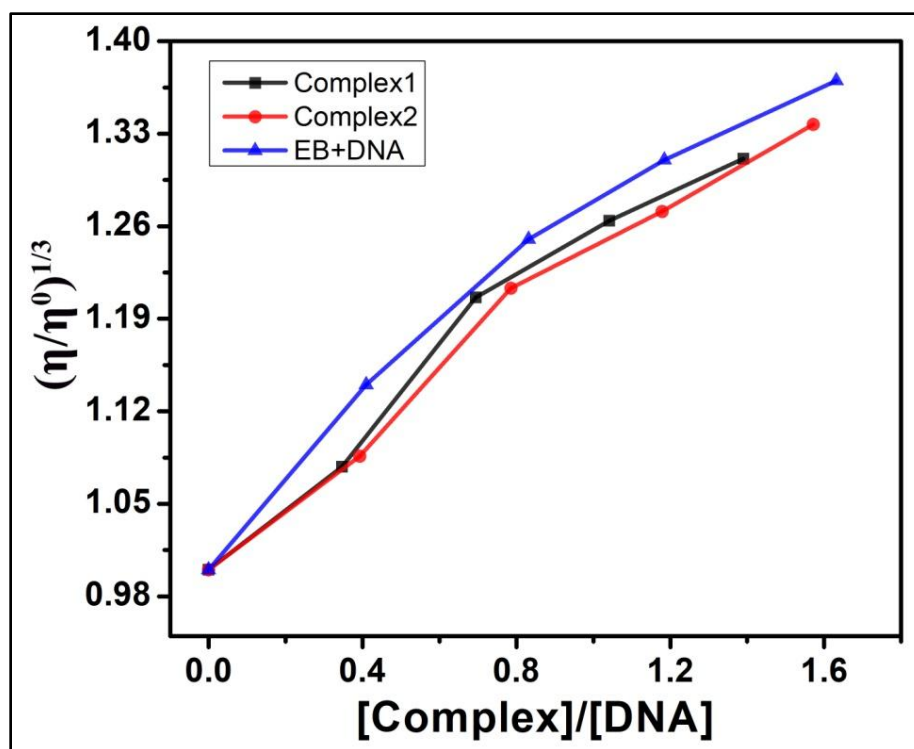

**Fig. S13** Viscosity measurement of DNA-EtBr and DNA-Complex 1 / 2 conjugate.

**Table S3** DNA - metal complexes patch dock score.

| Complex   | Patch Dock score | ACE (Kcal/mole) |
|-----------|------------------|-----------------|
| Complex 1 | 3474             | -498.00         |
| Complex 2 | 4920             | -516.71         |

**Table S4** HSA - metal complexes patch dock score.

| Complex   | Patch Dock score | ACE (Kcal/mole) |
|-----------|------------------|-----------------|
| Complex 1 | 7398             | -61.88          |
| Complex 2 | 5860             | -41.17          |

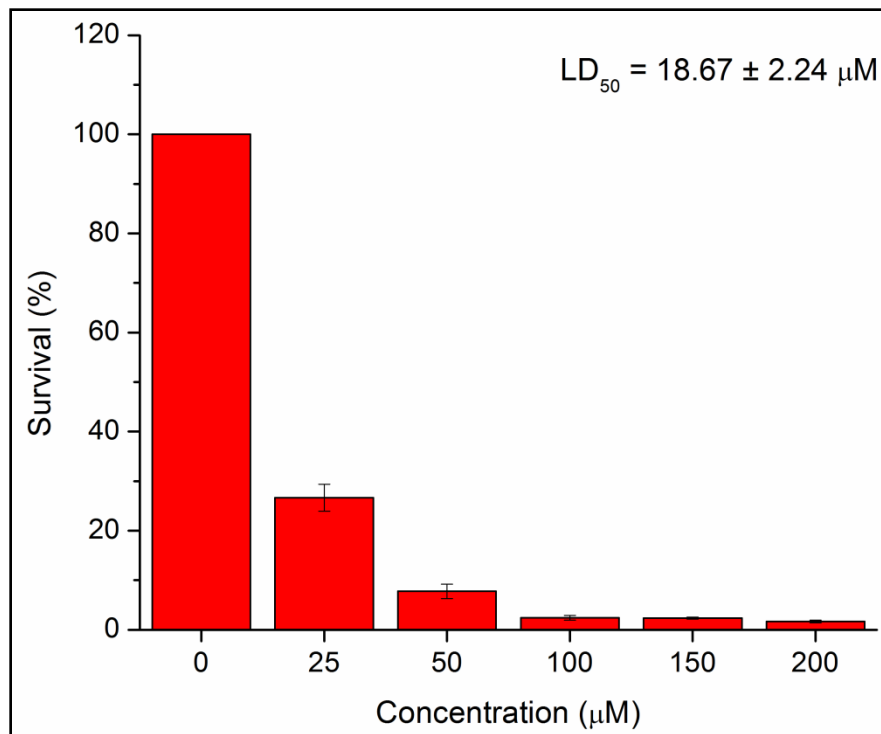

**Fig. S14** MTT assay using cis-platin as Positive control on HeLa cell line (LD<sub>50</sub> = 18.67 ± 2.24 µM).

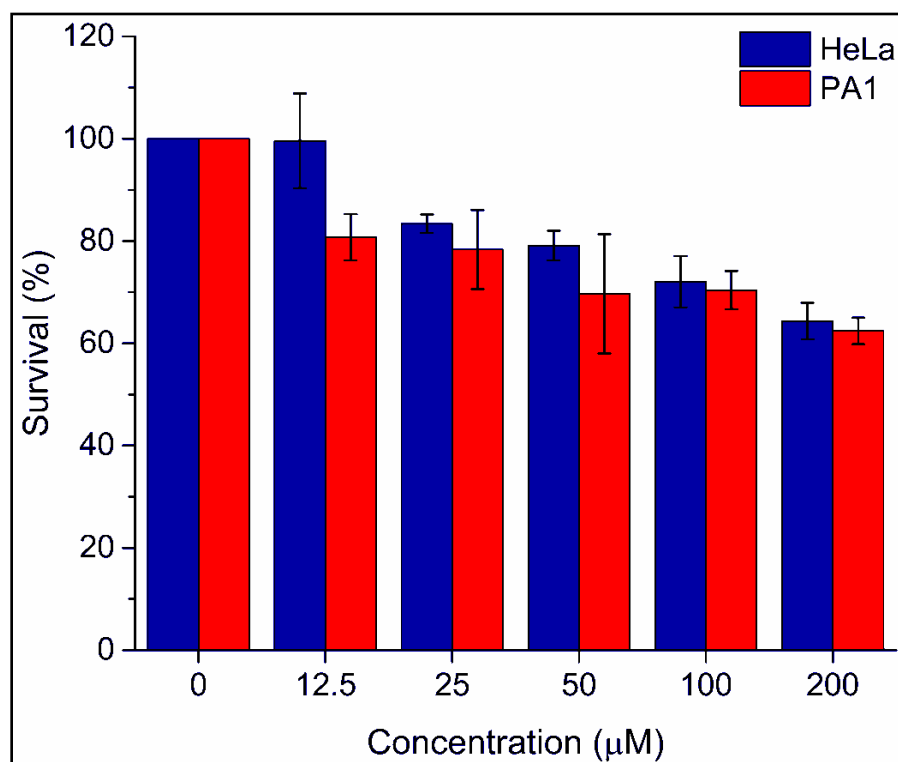

**Fig. S15** Cell viability of HeLa and PA1 cell line upon treatment with the Schiff base ligand (24 hrs).

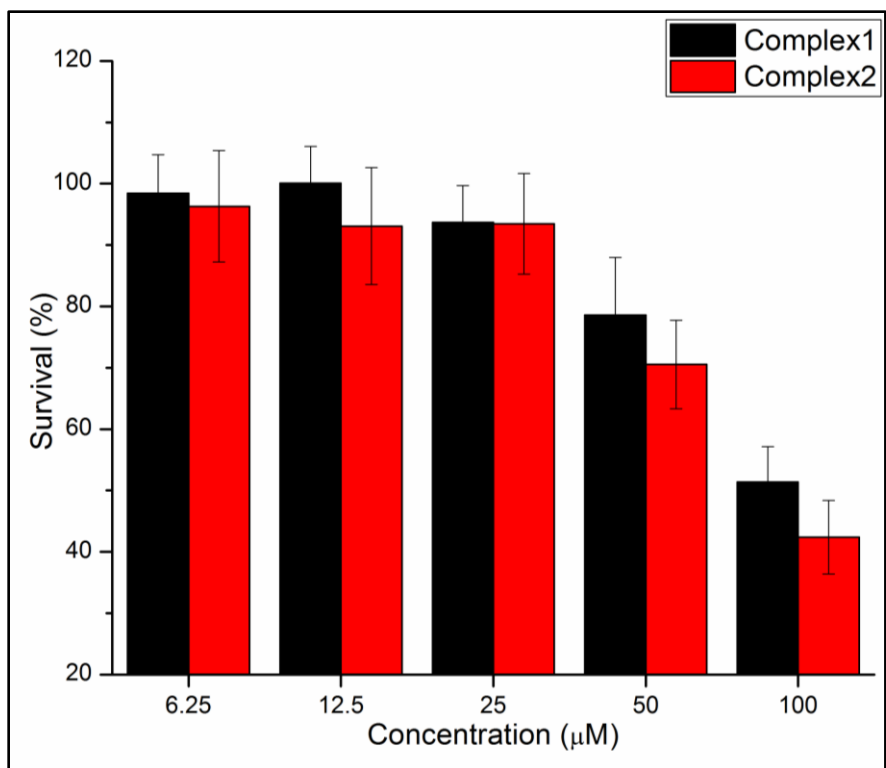

**Fig. S16** Effect of complex 1 & 2 on Normal cell line (hEG) in a dose dependant manner.
